# Supplementary material for: High Purity of α-Lactalbumin from Binary Protein Mixture by Charged UF Membrane Far from the Isoelectric Point to Limit Fouling
Source: MDPI journal article supplement (doi:10.3390/app11199167), 2021-10-02
Supplement: s1 [file s1]

## Supplementary Materials

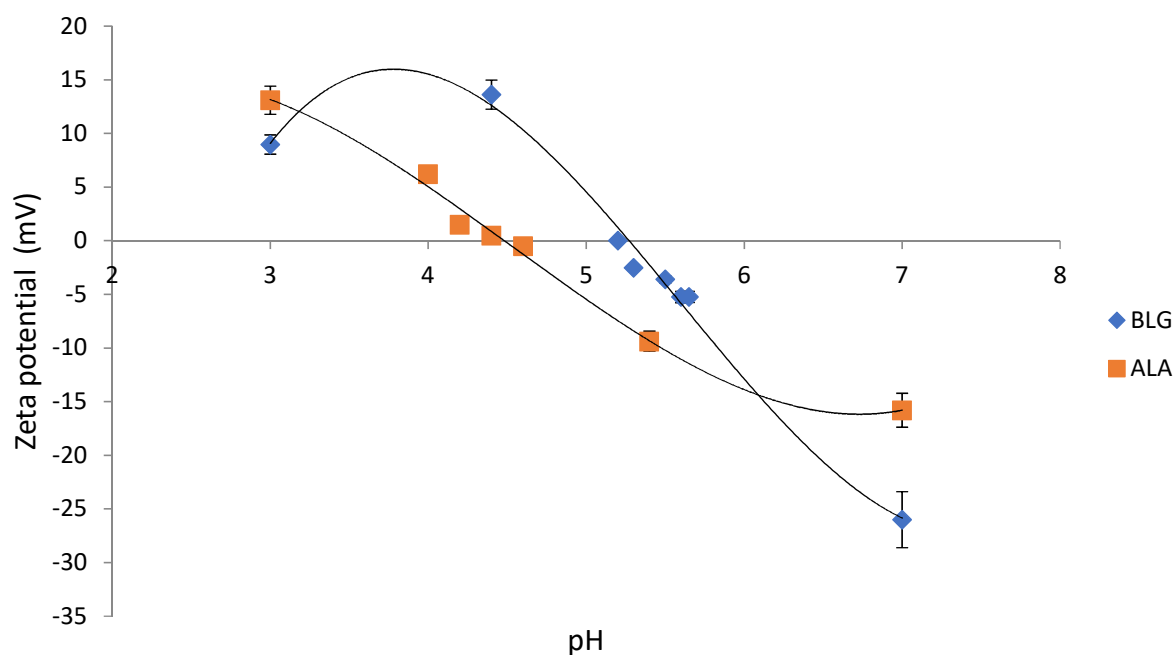

**Figure S1.** Zeta potential measurement as a function of pH of ALA and BLG (1 g·L<sup>-1</sup>).

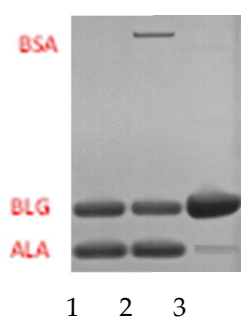

**Figure S2.** SDS-page carried out on final retentate (4.4. h) after UF by using binary protein mixture (1 g·L<sup>-1</sup>) pH 3.4 and charged regenerated cellulose membranes. 1: IS (1 g·L<sup>-1</sup>); 2: internal MW standard; 3: retentate obtained in the UF process after 4.4 h.
